# Supplementary material for: Identification of a Prognostic Signature of Malignant Melanoma Based on Tumor Immune Microenvironment Exploration
Source: Research Square preprint supplement (doi:10.21203/rs.3.rs-94428/v1), 2020-10-22
Supplement: Supplementary file 1 [file be50dea422ad51f6fb3fdf1c.xlsx]

## Sheet: tcga_met-di6-cor_cib22FF
Cells	SLPI	S100A7	LYZ	CCL19	CXCR4	CD79A	SLPI	S100A7	LYZ	CCL19	CXCR4	CD79A
B.cells.naive	0.0609486	-0.0552381	-0.0944013	0.303426	0.0400277	0.240944	1	1	1	6.74462e-07	1	0.000454202
B.cells.memory	-0.0442971	-0.0507895	0.287924	0.316104	0.306043	0.314156	1	1	3.95832e-06	1.49704e-07	5.00891e-07	1.89468e-07
Plasma.cells	0.0390934	0.0120697	0.308939	0.462819	0.331183	0.705971	1	1	3.58261e-07	5.5345e-18	2.16211e-08	2.90785e-52
T.cells.CD8	0.0184283	-0.0348756	0.431072	0.38269	0.307472	0.472828	1	1	2.92401e-15	1.21314e-11	4.24827e-07	6.70134e-19
T.cells.CD4.naive	-0.102591	0.0106166	-0.208809	-0.0968373	-0.115326	-0.157052	1	1	0.00711449	1	1	0.253722
T.cells.CD4.memory.resting	0.134472	0.0538851	-0.156166	-0.181944	-0.0357821	-0.256949	0.843572	1	0.264653	0.0518888	1	0.000101922
T.cells.CD4.memory.activated	-0.0704138	-0.00228342	0.277954	0.295687	0.237482	0.348151	1	1	1.17372e-05	1.63845e-06	0.000619285	2.14376e-09
T.cells.follicular.helper	-0.0650827	-0.0815295	-0.134199	-0.0748677	-0.174652	-0.0703451	1	1	0.844371	1	0.0840288	1
T.cells.regulatory..Tregs.	0.0161983	0.00565037	0.348289	0.417981	0.303962	0.428409	1	1	2.12002e-09	3.15505e-14	6.38212e-07	4.76963e-15
T.cells.gamma.delta	-0.0912202	-0.124443	0.0272556	-0.0376936	0.0272183	-0.0253465	1	1	1	1	1	1
NK.cells.resting	-0.0154922	-0.0045402	-0.233871	-0.117013	-0.0805113	-0.138808	1	1	0.000851673	1	1	0.683771
NK.cells.activated	0.0303497	-0.0296243	0.261402	0.0522878	0.145207	0.127789	1	1	6.57075e-05	1	0.488986	1
Monocytes	0.068786	0.0415498	0.302473	0.0941429	0.138715	0.122901	1	1	7.49019e-07	1	0.683771	1
Macrophages.M0	-0.0828497	0.0637099	-0.297469	-0.421683	-0.28736	-0.490739	1	1	1.3427e-06	1.62929e-14	4.17838e-06	1.28461e-20
Macrophages.M1	-0.0870881	-0.0647071	0.255378	0.317181	0.0311185	0.155365	1	1	0.000117969	1.31833e-07	1	0.274492
Macrophages.M2	-0.127535	-0.0914363	-0.33415	-0.479927	-0.396608	-0.552647	1	1	1.4663e-08	1.43985e-19	1.27114e-12	2.01005e-27
Dendritic.cells.resting	0.033189	-0.00590507	0.265622	0.383955	0.18927	0.242465	1	1	4.30359e-05	9.9936e-12	0.031329	0.000398094
Dendritic.cells.activated	0.180135	0.0960313	0.0844158	0.0475557	0.12512	0.0937806	0.0582414	1	1	1	1	1
Mast.cells.resting	-0.0122324	-0.072719	-0.192215	-0.166904	-0.255156	-0.249886	1	1	0.0254877	0.139112	0.000119366	0.000198081
Mast.cells.activated	0.0243022	0.188783	-0.0798619	-0.215477	-0.0839171	-0.163245	1	0.0320985	1	0.00416365	1	0.174074
Eosinophils	-0.00708481	0.0535438	0.0569082	-0.00294908	0.151618	0.0420505	1	1	1	1	0.339944	1
Neutrophils	0.142061	0.13357	0.112135	-0.134151	0.0639462	-0.0693714	0.577551	0.849127	1	0.844371	1	1
