# Supplementary material for: Identification of a Prognostic Signature of Malignant Melanoma Based on Tumor Immune Microenvironment Exploration
Source: Research Square preprint supplement (doi:10.21203/rs.3.rs-94428/v1), 2020-10-22
Supplement: Supplementary file 2 [file db281d0155c31cf516552784.xlsx]

## Sheet: tcga.pri.ESTIMATE.purity
Sample	StromalScore	ImmuneScore	ESTIMATEScore	TumorPurity
TCGA.D9.A4Z2.01A	-285.026	-227.307	-512.334	0.862917
TCGA.BF.A5EO.01A	-523.459	686.217	162.758	0.808688
TCGA.D9.A4Z3.01A	-625.037	30.8977	-594.139	0.868923
TCGA.EB.A3XB.01A	-624.442	442.245	-182.198	0.837424
TCGA.EB.A85I.01A	-473.434	948.858	475.425	0.780848
TCGA.FR.A728.01A	-21.6168	1595.98	1574.36	0.670373
TCGA.EB.A85J.01A	-830.802	1707.39	876.584	0.742729
TCGA.BF.A1PZ.01A	-1090.42	-247.477	-1337.9	0.917678
TCGA.WE.A8K4.01A	-872.107	1428.13	556.027	0.773402
TCGA.EB.A3XE.01A	-172.958	546.667	373.709	0.790088
TCGA.EB.A4OY.01A	-807.974	300.798	-507.176	0.862534
TCGA.FR.A2OS.01A	-651.553	-285.801	-937.354	0.892745
TCGA.ER.A42H.01A	-236.837	-502.264	-739.101	0.879257
TCGA.BF.AAOU.01A	-407.159	380.768	-26.391	0.824706
TCGA.ER.A19T.01A	-757.173	-1255.77	-2012.95	0.952483
TCGA.ER.A19T.06A	-212.311	748.635	536.324	0.775232
TCGA.EB.A3XC.01A	-494.536	194.563	-299.973	0.846748
TCGA.EB.A5FP.01A	-1388.26	-736.148	-2124.41	0.957339
TCGA.BF.AAP1.01A	-1085.21	-671.954	-1757.17	0.940378
TCGA.EB.A551.01A	209.494	2043.7	2253.19	0.593231
TCGA.XV.AAZY.01A	-185.34	1090.93	905.592	0.739871
TCGA.XV.A9W2.01A	-1102.11	-285.966	-1388.08	0.92058
TCGA.GN.A26C.01A	353.95	2256.05	2610	0.550273
TCGA.EB.A57M.01A	628.85	514.049	1142.9	0.715993
TCGA.EB.A5UM.01A	-755.21	1095	339.786	0.793131
TCGA.D3.A5GT.01A	-1248.57	-798.136	-2046.71	0.953981
TCGA.EB.A41B.01A	-1366.67	-345.446	-1712.12	0.938109
TCGA.BF.A1Q0.01A	-847.638	334.127	-513.511	0.863004
TCGA.ER.A19K.01A	-715.223	332.48	-382.744	0.853149
TCGA.GN.A8LN.01A	-700.096	111.492	-588.604	0.86852
TCGA.BF.A3DJ.01A	-146.54	917.057	770.517	0.753064
TCGA.EB.A6QY.01A	-1144.1	-282.62	-1426.72	0.922781
TCGA.BF.AAP8.01A	-787.086	-197.279	-984.365	0.895833
TCGA.EB.A6QZ.01A	-959.998	-428.088	-1388.09	0.92058
TCGA.EB.A4XL.01A	-273.142	551.282	278.14	0.79861
TCGA.BF.A5EP.01A	-747.737	-530.45	-1278.19	0.914161
TCGA.EB.A299.01A	-319.024	353.041	34.0165	0.819659
TCGA.EB.A44P.01A	-852.164	-109.968	-962.132	0.894378
TCGA.EB.A3Y7.01A	-922.367	-220.57	-1142.94	0.905933
TCGA.BF.A5ER.01A	-696.778	-285.539	-982.317	0.8957
TCGA.EB.A24D.01A	-594.622	-69.755	-664.377	0.87398
TCGA.EB.A431.01A	-1150.56	-360.48	-1511.04	0.927479
TCGA.EB.A3XF.01A	-610.143	641.575	31.4315	0.819877
TCGA.BF.A3DL.01A	-334.908	-153.799	-488.707	0.861159
TCGA.BF.A1PX.01A	441.137	1937.44	2378.58	0.578315
TCGA.EB.A550.01A	-775.698	-267.194	-1042.89	0.899618
TCGA.BF.A3DM.01A	-904.3	-723.693	-1627.99	0.93376
TCGA.GN.A263.01A	174.216	562.411	736.627	0.756327
TCGA.EB.A4OZ.01A	-119.423	1823.73	1704.31	0.656098
TCGA.EB.A553.01A	-363.808	727.081	363.273	0.791026
TCGA.EB.A3Y6.01A	58.6996	194.672	253.372	0.800792
TCGA.EB.A44N.01A	-145.961	806.369	660.408	0.763599
TCGA.ER.A196.01A	-599.698	65.1974	-534.501	0.864557
TCGA.EB.A3XD.01A	553.649	1358.04	1911.69	0.632824
TCGA.D9.A3Z4.01A	-134.992	806.378	671.386	0.762558
TCGA.EB.A5SF.01A	-244.434	-120.61	-365.044	0.85179
TCGA.EB.A4IQ.01A	-1192.34	-452.432	-1644.77	0.934639
TCGA.EB.A6R0.01A	-832.712	1044.26	211.545	0.804455
TCGA.BF.A5EQ.01A	276.183	886.558	1162.74	0.713956
TCGA.GF.A769.01A	-1105.36	-380.451	-1485.81	0.926088
TCGA.ER.A194.01A	35.7343	1164.29	1200.03	0.710113
TCGA.BF.AAOX.01A	-1337.86	-543.288	-1881.15	0.946412
TCGA.FW.A5DX.01A	-1014.01	-623.832	-1637.84	0.934277
TCGA.EB.A24C.01A	-445.564	-587.848	-1033.41	0.899009
TCGA.ER.A2NB.01A	-324.71	1300.46	975.747	0.732904
TCGA.IH.A3EA.01A	-1125.77	258.607	-867.166	0.888056
TCGA.EB.A97M.01A	-466.798	685.713	218.915	0.803812
TCGA.BF.A5ES.01A	-212.693	556.152	343.459	0.792802
TCGA.EB.A4IS.01A	278.332	1874.25	2152.58	0.605055
TCGA.EB.A5VU.01A	-478.981	-250.2	-729.18	0.878563
TCGA.FS.A1ZN.01A	-1074.59	-516.847	-1591.44	0.931826
TCGA.EB.A42Z.01A	-306.262	57.8004	-248.462	0.842701
TCGA.GN.A4U5.01A	-282.641	1564.55	1281.91	0.7016
TCGA.BF.AAP2.01A	-936.572	337.107	-599.464	0.869309
TCGA.XV.AAZV.01A	99.2904	1671.49	1770.78	0.648704
TCGA.D9.A6E9.06A	142.672	2562.15	2704.82	0.538599
TCGA.BF.AAP7.01A	293.849	1801.56	2095.41	0.611715
TCGA.EB.A1NK.01A	-232.945	209.44	-23.5045	0.824467
TCGA.EB.A5SE.01A	-823.613	-524.348	-1347.96	0.918264
TCGA.EB.A51B.01A	-1431.53	-113.071	-1544.61	0.92931
TCGA.EB.A4P0.01A	-444.946	-8.99333	-453.939	0.858554
TCGA.BF.A1PU.01A	-540.494	-1031.55	-1572.04	0.93079
TCGA.BF.A9VF.01A	-1353.79	-655.913	-2009.7	0.952338
TCGA.EB.A44O.01A	-1159.13	-395.085	-1554.22	0.92983
TCGA.EB.A3HV.01A	165.703	392.814	558.517	0.773171
TCGA.EB.A82B.01A	-430.548	1015.42	584.868	0.770712
TCGA.XV.A9W5.01A	-343.159	116.062	-227.097	0.841008
TCGA.YG.AA3N.01A	-507.617	1636.31	1128.7	0.717446
TCGA.BF.AAP6.01A	-796.056	-300.595	-1096.65	0.903036
TCGA.FR.A3R1.01A	-719.496	258.971	-460.526	0.859049
TCGA.BF.A3DN.01A	94.9072	-385.905	-290.998	0.846046
TCGA.BF.AAP4.01A	-391.43	1108.04	716.61	0.758246
TCGA.ER.A2NF.01A	388.569	1032.14	1420.71	0.686937
TCGA.ER.A2NF.06A	-979.211	534.208	-445.003	0.85788
TCGA.XV.AAZW.01A	-608.669	-596.02	-1204.69	0.909734
TCGA.EB.A42Y.01A	-358.087	-47.2302	-405.317	0.854872
