# Supplementary material for: Identification of a Prognostic Signature of Malignant Melanoma Based on Tumor Immune Microenvironment Exploration
Source: Research Square preprint supplement (doi:10.21203/rs.3.rs-94428/v1), 2020-10-22
Supplement: Supplementary file 3 [file fb99176f911d9098244cda19.xlsx]

## Sheet: tcga_met-ici9-cor_cib22FF
Cells	PDCD1	CD274	CD276	CTLA4	IDO1	LAG3	VTCN1	HAVCR2	TNFRSF4	PDCD1	CD274	CD276	CTLA4	IDO1	LAG3	VTCN1	HAVCR2	TNFRSF4
B.cells.naive	-0.131877	-0.175287	-0.127535	-0.0642895	-0.180125	-0.216192	0.146071	-0.251359	-0.025244	1	0.10059	1	1	0.0740565	0.00521776	0.543736	0.000241365	1
B.cells.memory	0.268395	0.250948	-0.143646	0.192415	0.315469	0.217287	-0.145851	0.248153	0.22251	4.40547e-05	0.000249378	0.611153	0.0318809	2.09095e-07	0.0048375	0.54457	0.00032445	0.00312839
Plasma.cells	0.409334	0.278622	-0.173481	0.24255	0.351192	0.393549	-0.0290649	0.297847	0.246849	2.03879e-13	1.49802e-05	0.11263	0.000536249	1.89819e-09	2.94559e-12	1	1.72069e-06	0.000362188
T.cells.CD8	0.754932	0.558321	-0.206149	0.37578	0.623655	0.755451	-0.187919	0.573306	0.277763	8.23972e-64	5.97619e-28	0.0115457	4.92604e-11	4.88595e-37	6.01249e-64	0.0436183	7.43746e-30	1.63308e-05
T.cells.CD4.naive	-0.193899	-0.102125	0.0729604	-0.117969	-0.187056	-0.188624	0.0395695	-0.225117	-0.104579	0.0287849	1	1	1	0.045608	0.0418031	1	0.00253696	1
T.cells.CD4.memory.resting	-0.455523	-0.336011	0.0857187	-0.206435	-0.326779	-0.493984	0.100274	-0.302773	-0.0844593	3.5397e-17	1.51104e-08	1	0.011381	5.03395e-08	8.87003e-21	1	9.65721e-07	1
T.cells.CD4.memory.activated	0.434828	0.392849	-0.163662	0.352518	0.416459	0.475815	-0.0252799	0.392725	0.154977	2.01022e-15	3.28749e-12	0.206691	1.57938e-09	5.82865e-14	5.02231e-19	1	3.3359e-12	0.33799
T.cells.follicular.helper	0.0384503	0.00326382	-0.0926904	-0.00284906	0.0591715	0.0170737	0.108733	-0.16069	-0.166502	1	1	1	1	1	1	1	0.247156	0.173774
T.cells.regulatory..Tregs.	0.480451	0.315466	-0.105628	0.291678	0.327867	0.427797	-0.152428	0.348276	0.381505	1.84953e-19	2.09095e-07	1	3.49872e-06	4.39314e-08	7.43779e-15	0.381959	2.82014e-09	2.02647e-11
T.cells.gamma.delta	0.0631704	0.0879516	-0.0634373	0.00293869	0.109127	0.100093	-0.0256849	0.0915846	-0.130122	1	1	1	1	1	1	1	1	1
NK.cells.resting	-0.33274	-0.313255	0.122318	-0.149444	-0.348746	-0.373309	0.078017	-0.316021	-0.0373514	2.31665e-08	2.72061e-07	1	0.451325	2.65501e-09	7.18104e-11	1	1.96388e-07	1
NK.cells.activated	0.478765	0.464444	-0.0838779	0.34359	0.490829	0.550492	-0.101208	0.442478	0.176493	2.6659e-19	5.64925e-18	1	5.40801e-09	1.81014e-20	5.4056e-27	1	4.66812e-16	0.0935002
Monocytes	0.195888	0.177494	-0.0900703	0.104696	0.170506	0.199454	-0.0896022	0.326133	0.248088	0.0249903	0.0880963	1	1	0.136176	0.0193541	1	5.44163e-08	0.00032445
Macrophages.M0	-0.5417	-0.478458	0.389018	-0.187543	-0.525045	-0.503538	0.0360392	-0.395714	-0.198147	5.9894e-26	2.83592e-19	6.08892e-12	0.0444268	4.74094e-24	9.50342e-22	1	2.06832e-12	0.0212182
Macrophages.M1	0.334056	0.378274	-0.15696	0.0569693	0.452511	0.34164	-0.0598928	0.233028	0.0501982	1.95457e-08	3.35549e-11	0.302421	1	6.47389e-17	7.04121e-09	1	0.00127866	1
Macrophages.M2	-0.492386	-0.303199	0.154226	-0.428787	-0.441732	-0.449662	0.0285342	-0.258986	-0.323847	1.2743e-20	9.24071e-07	0.346366	6.22368e-15	5.3668e-16	1.13948e-16	1	0.000114135	7.27717e-08
Dendritic.cells.resting	0.113907	0.115488	-0.0270922	0.0718597	0.0693147	0.0619599	0.0516483	0.125926	0.0929448	1	1	1	1	1	1	1	1	1
Dendritic.cells.activated	0.0193913	0.0837805	-0.0907062	0.110517	0.0956688	-0.00447757	0.00302608	0.0559175	0.108644	1	1	1	1	1	1	1	1	1
Mast.cells.resting	-0.222742	-0.228497	0.0209915	-0.349155	-0.216286	-0.244847	0.154976	-0.213289	-0.262372	0.00309131	0.00190112	1	2.52128e-09	0.00521776	0.000435001	0.33799	0.0065818	8.1548e-05
Mast.cells.activated	-0.15732	-0.0632198	0.139389	-0.00204846	-0.104982	-0.11596	-0.0397749	-0.0727583	0.0521125	0.298858	1	0.768015	1	1	1	1	1	1
Eosinophils	0.0761752	0.0936339	-0.0268957	0.168189	0.113566	0.0776129	0.0296087	0.130265	0.0358313	1	1	1	0.157174	1	1	1	1	1
Neutrophils	-0.000837533	0.10051	0.135842	0.0323725	0.0737241	0.021647	-0.0259532	0.160414	-0.0948904	1	1	0.922731	1	1	1	1	0.24895	1
